# Supplementary material for: Clinical characteristics and prognosis analysis of idiopathic and hereditary pulmonary hypertension patients with ACVRL1 gene mutations
Source: PubMed Central journal article supplement — Pulm Circ. 2021 Oct 14;11(4):20458940211044577. doi: 10.1177/20458940211044577 (PMC8711680; doi:10.1177/20458940211044577), 2021-10-14
Supplement: sj-pdf-2-pul-10.1177_20458940211044577.pdf [file sj-pdf-2-pul-10.1177_20458940211044577.pdf]

E S V/M A  
GAG|AGT|NTG|GCC

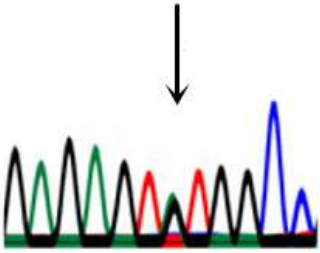

Patient 5 (c.676G>A)

I F R/G T  
ATC|TTC|NGT|ACA

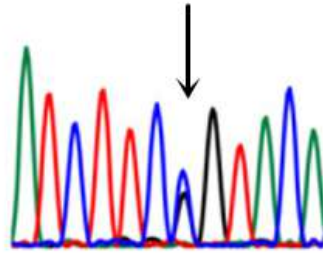

Patient 6 (c.955G>C)

A R R/W T  
GCC|CGC|NGG|ACC

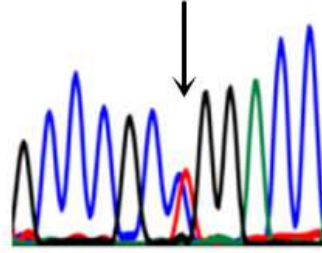

Patient 10 (c.1231C>T)

A L R/W I  
GCG|CTG|NGG|ATC

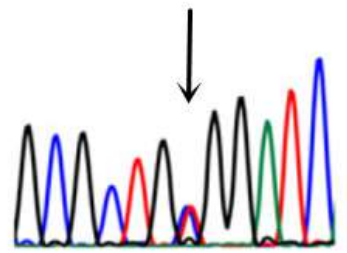

Patient 11 (c.1450C>T)
