# Supplementary material for: Clinical characteristics and prognosis analysis of idiopathic and hereditary pulmonary hypertension patients with ACVRL1 gene mutations
Source: PubMed Central journal article supplement — Pulm Circ. 2021 Oct 14;11(4):20458940211044577. doi: 10.1177/20458940211044577 (PMC8711680; doi:10.1177/20458940211044577), 2021-10-14
Supplement: sj-pdf-3-pul-10.1177_20458940211044577.pdf [file sj-pdf-3-pul-10.1177_20458940211044577.pdf]

|        |                    |        |                    |        |                    |
|--------|--------------------|--------|--------------------|--------|--------------------|
| 1      | p.P26L             | 2      | p.Q201K            | 3      | p.E215K            |
| Human  | DPVK <b>P</b> SRGP | Human  | TVAR <b>Q</b> VALV | Human  | GRYGE <b>V</b> WRG |
| Chimp  | DPVK <b>P</b> SRGP | Chimp  | TVAR <b>Q</b> VALV | Chimp  | GRYGE <b>V</b> WRG |
| Rhesus | DPVK <b>P</b> SRGP | Rhesus | TVAR <b>Q</b> VALV | Rhesus | GRYGE <b>V</b> WRG |
| Rat    | DPVK <b>P</b> SRGP | Rat    | TVAR <b>Q</b> VALV | Rat    | GRYGE <b>V</b> WRG |
| Mouse  | DLAK <b>P</b> SA-- | Mouse  | TVAR <b>Q</b> VALV | Mouse  | GRYGE <b>V</b> WRG |
| 4      | p.H222P            | 5      | p.V226M            | 6      | p.G319R            |
| Human  | RGLW <b>H</b> GESV | Human  | HGES <b>V</b> AVKI | Human  | VEIF <b>G</b> TQGK |
| Chimp  | RGLW <b>H</b> GESV | Chimp  | HGES <b>V</b> AVKI | Chimp  | VEIF <b>G</b> TQGK |
| Rhesus | RGLW <b>H</b> GESV | Rhesus | HGES <b>V</b> AVKI | Rhesus | VEIF <b>G</b> TQGK |
| Rat    | RGLW <b>H</b> GESV | Rat    | HGES <b>V</b> AVKI | Rat    | VEIF <b>G</b> TQGK |
| Mouse  | RGLW <b>H</b> GESV | Mouse  | HGES <b>V</b> AVKI | Mouse  | VEIF <b>G</b> TQGK |
| 7      | p.R374W            | 8      | p.E379K            | 9      | p.W406L            |
| Human  | VGTK <b>R</b> YMAP | Human  | YMAPE <b>V</b> LDE | Human  | GLVL <b>W</b> EIAR |
| Chimp  | VGTK <b>R</b> YMAP | Chimp  | YMAPE <b>V</b> LDE | Chimp  | GLVL <b>W</b> EIAR |
| Rhesus | VGTK <b>R</b> YMAP | Rhesus | YMAPE <b>V</b> LDE | Rhesus | GLVL <b>W</b> EIAR |
| Rat    | VGTK <b>R</b> YMAP | Rat    | YMAPE <b>V</b> LDE | Rat    | GLVL <b>W</b> EIAR |
| Mouse  | VGTK <b>R</b> YMAP | Mouse  | YMAPE <b>V</b> LDE | Mouse  | GLVL <b>W</b> EIAR |
| 10     | p.R411W            | 11     | p.R484W            | 12     | p.R484Q            |
| Human  | EIAR <b>R</b> TIVN | Human  | LTAL <b>R</b> IKKT | Human  | LTAL <b>R</b> IKKT |
| Chimp  | EIAR <b>R</b> TIVN | Chimp  | LTAL <b>R</b> IKKT | Chimp  | LTAL <b>R</b> IKKT |
| Rhesus | EIAR <b>R</b> TIVN | Rhesus | LTAL <b>R</b> IKKT | Rhesus | LTAL <b>R</b> IKKT |
| Rat    | EIAR <b>R</b> TIIN | Rat    | LTAL <b>R</b> IKKT | Rat    | LTAL <b>R</b> IKKT |
| Mouse  | EIAR <b>R</b> TIIN | Mouse  | LTAL <b>R</b> IKKT | Mouse  | LTAL <b>R</b> IKKT |
