# Supplementary material for: Clinical characteristics and prognosis analysis of idiopathic and hereditary pulmonary hypertension patients with ACVRL1 gene mutations
Source: PubMed Central journal article supplement — Pulm Circ. 2021 Oct 14;11(4):20458940211044577. doi: 10.1177/20458940211044577 (PMC8711680; doi:10.1177/20458940211044577), 2021-10-14
Supplement: sj-pdf-4-pul-10.1177_20458940211044577.pdf [file sj-pdf-4-pul-10.1177_20458940211044577.pdf]

Supplement Table S2: Primer sequences of *ACVRL1* used in Sanger sequencing and mutagenesis

| mRNA      | Primer    | Forward (5'-3')       | Reverse (5'-3')       | Length, bp |
|-----------|-----------|-----------------------|-----------------------|------------|
| NM_000020 | c.77C>T   | TTC AAGGTGTTGTCTGAGGG | GAGAGGAAAGGAGGGAAGGG  | 438        |
| NM_000020 | c.601C>A  | AGAGGGGTCACCCAGAGATT  | CGGTCCTGCAGAAAGAAGAA  | 423        |
| NM_000020 | c.643G>A  | GTTCTTCTTTCTGCAGGACCG | GCTCCAGTGAGATTGCACCA  | 593        |
| NM_000020 | c.665A>C  | GTTCTTCTTTCTGCAGGACCG | GCTCCAGTGAGATTGCACCA  | 593        |
| NM_000020 | c.676G>A  | TAAGGGTCTGGGGTTCTGTG  | AAGAGGTTGATGCTGCAGGT  | 397        |
| NM_000020 | C.955G>C  | ACGACTCCAGCCTCCCTTAG  | AGACAACCTCGTGGGGTCTTG | 493        |
| NM_000020 | c.1120C>T | CCTAGAGAGCACTACACAAGC | GATTCACAGCCAGACTCACA  | 608        |
| NM_000020 | c.1135G>A | ATTACCTGGACATCGGCAAC  | GGTGCCAGGAGGTCTGACT   | 284        |
| NM_000020 | c.1217G>T | CCTAGAGAGCACTACACAAGC | GATTCACAGCCAGACTCACA  | 608        |
| NM_000020 | c.1231C>T | GGGCCATGGTTCTCTCTGT   | CCAGGAGGTCTGACTGCAA   | 474        |
| NM_000020 | c.1450C>T | GGCCATCCTCCTCATCTTCT  | CTCTGGAGCCTCTTTTGCAT  | 565        |
| NM_000020 | c.1451G>A | GCATCTCTCTCTGCCTCC    | CTTGCACTCTGACTCTGGA   | 499        |
