# Supplementary material for: Clinical characteristics and prognosis analysis of idiopathic and hereditary pulmonary hypertension patients with ACVRL1 gene mutations
Source: PubMed Central journal article supplement — Pulm Circ. 2021 Oct 14;11(4):20458940211044577. doi: 10.1177/20458940211044577 (PMC8711680; doi:10.1177/20458940211044577), 2021-10-14
Supplement: sj-pdf-5-pul-10.1177_20458940211044577.pdf [file sj-pdf-5-pul-10.1177_20458940211044577.pdf]

Supplement Table S4: Clinical characteristics of twelve patients with PAH carrying *ACVRL1* mutations

| Variables                            | Patient * |       |        |      |     |       |      |       |       |      |       |      |
|--------------------------------------|-----------|-------|--------|------|-----|-------|------|-------|-------|------|-------|------|
|                                      | 1         | 2     | 3      | 4    | 5   | 6     | 7    | 8     | 9     | 10   | 11    | 12   |
| Sex                                  | M         | F     | M      | F    | M   | F     | M    | M     | F     | F    | M     | F    |
| Age at onset,(year)                  | 4.8       | 13.5  | 10.4   | 2.9  | 2.6 | 28.8  | 4.6  | 36    | 10.6  | 27.5 | 4.6   | 8.4  |
| Age at diagnosis(year)               | 4.9       | 15.8  | 10.6   | 3.2  | 3.8 | 29.5  | 5.1  | 36.5  | 11.1  | 27.6 | 6.6   | 8.9  |
| Age at death(year)                   | -         | 17.4  | -      | -    | 5.8 | 31.8  | -    | -     | -     | 27.6 | 9.2   | -    |
| Known features of PH                 |           |       |        |      |     |       |      |       |       |      |       |      |
| Family history of PH                 | -         | +     | -      | +    | -   | +     | -    | -     | -     | -    | -     | -    |
| Symptoms at onset                    |           |       |        |      |     |       |      |       |       |      |       |      |
| Breathlessness                       | +         | +     | -      | +    | -   | -     | +    | +     | -     | +    | -     | -    |
| Fatigue                              | +         | +     | +      | +    | +   | +     | +    | +     | +     | +    | +     | +    |
| Syncope                              | +         | -     | +      | +    | -   | +     | -    | -     | +     | -    | -     | +    |
| Chest pain                           | -         | -     | -      | -    | -   | -     | +    | -     | -     | -    | -     | -    |
| NYHA FC                              | III       | III   | III    | III  | II  | II    | IV   | III   | III   | IV   | III   | II   |
| BNP(pg/ml)                           | 939       | 681   | 975.57 | 1248 | 698 | 478   | 5000 | 93    | 469   | 432  | 788.3 | 658  |
| SPAP (cardiac echocardiography) mmHg | 96        | 15    | 193    | 71   | 96  | 109   | 93   | 75    | 86    | 74   | 134   | 46   |
| RHC parameters                       |           |       |        |      |     |       |      |       |       |      |       |      |
| MPAP(mmHg)                           | 95        | 68    | 70     | Na   | 78  | 58    | Na   | 50    | 82    | Na   | 78    | 52   |
| RAP(mmHg)                            | 8         | 3     | 14     | Na   | 17  | 9     | Na   | 2     | 13    | Na   | 11    | 7    |
| PCWP(mmHg)                           | 12        | Na    | 9      | Na   | Na  | 6     | Na   | 9     | 2     | Na   | 15    | 12   |
| PVR(wood units)                      | 41.92     | 12.62 | 15.68  | Na   | 25  | 12.99 | Na   | 10.63 | 20.17 | Na   | 23.4  | 9.26 |
| CI(l/min/m <sup>2</sup> )            | 2.87      | 3.48  | 2.8    | Na   | 2.8 | 2.75  | Na   | 1.95  | 2.4   | Na   | 2.6   | 4.45 |
| SvO <sub>2</sub> (%)                 | 61        | 75    | 66.65  | Na   | 72  | 71    | Na   | 68.5  | 54.7  | Na   | 70    | 74   |
| AVT (+, -)                           | -         | -     | -      | Na   | -   | -     | Na   | -     | -     | Na   | -     | -    |

NYHA FC, New York Heart Association Function Class; CI, cardiac index, normal value: 2.6–4 l/min per m<sup>2</sup>; BNP, brain natriuretic peptide; PCWP, pulmonary capillary wedge pressure, normal value ≤15 mmHg; mPAP, mean pulmonary arterial pressure, normal range 10–20 mmHg; PVR, pulmonary vascular resistance, normal value 0.25–1.6 Wood units; SPAP, Systolic pulmonary arterial pressure, normal value <30 mmHg; Na, Data unavailable; AVT, acute pulmonary vasodilatation test; SvO<sub>2</sub>, mixed venous oxygen saturation; \*Plus (+) signs indicate the presence of a characteristic, and minus (-) signs indicate the absence of a characteristic and negative;
