# Supplementary material for: Clinical characteristics and prognosis analysis of idiopathic and hereditary pulmonary hypertension patients with ACVRL1 gene mutations
Source: PubMed Central journal article supplement — Pulm Circ. 2021 Oct 14;11(4):20458940211044577. doi: 10.1177/20458940211044577 (PMC8711680; doi:10.1177/20458940211044577), 2021-10-14
Supplement: sj-pdf-6-pul-10.1177_20458940211044577.pdf [file sj-pdf-6-pul-10.1177_20458940211044577.pdf]

Supplement Table S3. The Curacao Criteria\*

| <b>The HHT diagnosis is</b> |                                                                                                                                      |
|-----------------------------|--------------------------------------------------------------------------------------------------------------------------------------|
| Definite                    | if 3 criteria are present,                                                                                                           |
| Possible or suspected       | if 2 criteria are present, and                                                                                                       |
| Unlikely                    | if fewer than 2 criteria are present                                                                                                 |
| <b>Criteria</b>             |                                                                                                                                      |
| 1. Epistaxis                | spontaneous, recurrent nose bleeds                                                                                                   |
| 2. Telangiectases           | multiple, at characteristic sites:<br>lips<br>oral cavity<br>fingers<br><br>Nose                                                     |
| 3. Visceral lesions         | such as<br>Gastrointestinal telangiectasia (with or without bleeding)<br>Pulmonary AVM<br>Hepatic AVM<br>Cerebral AVMs<br>Spinal AVM |
| 4. Family history           | <u>a first degree relative with HHT according to these criteria</u>                                                                  |

\*.Shovlin CL, Guttmacher AE, Buscarini E, Faughnan ME, Hyland RH, Westermann CJ, Kjeldsen AD, Plauchu H. Diagnostic criteria for hereditary hemorrhagic telangiectasia (Rendu-Osler-Weber syndrome). Am J Med Genet. 2000 Mar 6;91(1):66-7. doi: 10.1002/(sici)1096-8628(20000306)91:1<66::aid-ajmg12>3.0.co;2-p. PMID: 10751092.
