# Supplementary material for: Clinical characteristics and prognosis analysis of idiopathic and hereditary pulmonary hypertension patients with ACVRL1 gene mutations
Source: PubMed Central journal article supplement — Pulm Circ. 2021 Oct 14;11(4):20458940211044577. doi: 10.1177/20458940211044577 (PMC8711680; doi:10.1177/20458940211044577), 2021-10-14
Supplement: sj-pdf-7-pul-10.1177_20458940211044577.pdf [file sj-pdf-7-pul-10.1177_20458940211044577.pdf]

Supplement Table S1. Details of *BMP2* mutations (Transcript is NM\_001204)

| patient | Mutation Location | Mutation Category | Nucleotide Change             | Amino Acid Change |
|---------|-------------------|-------------------|-------------------------------|-------------------|
| 1       | Exon1             | —                 | (G-A)-669 to initiation codon | —                 |
| 2       | Exon1             | Deletion          | c.36delC                      | p.Trp13GlyfsTer34 |
| 3       | Exon1             | Splice-site       | c.76+1G>C                     | —                 |
| 4       | Exon3             | Missense          | c.347G>C                      | p.C116S           |
| 5       | Exon3             | Missense          | c.350G>A                      | p.C117Y           |
| 6       | Exon3             | Missense          | c.371A>G                      | p.N124S           |
| 7       | Exon4             | Frameshift        | c.458delT                     | p.I153Mfs*9       |
| 8       | Exon5             | Splice-site       | c.621+8T>C                    | —                 |
| 9       | Exon5             | Splice-site       | c.621+8T>C                    | —                 |
| 10      | Exon6             | Nonsense          | c.631C>T                      | p.R211X           |
| 11      | Exon6             | Nonsense          | c.637C>T                      | p.R213X           |
| 12      | exon7             | Deletion          | c.865_876del                  | p.289_292del      |
| 13      | exon7             | Missense          | c.877C>T                      | p.L293F           |
| 14      | exon7             | Missense          | c.893G>A                      | p.W298X           |
| 15      | Exon8             | Splice-site       | c.968-1G>T                    | —                 |
| 8       | Exon8             | Missense          | c.1042G>A                     | p.V348I           |
| 16      | Exon8             | Frameshift        | c.1122dupA                    | p.S375Kfs*23      |
| 17      | Exon9             | Nonsense          | c.1141A>T                     | p.R381X           |
| 18      | Exon9             | Missense          | c.1226 T>G                    | p.L409R           |
| 19      | Exon9             | Missense          | c.1228G>A                     | p.Gly410Arg       |
| 20      | Exon10            | Frameshift        | c.1269_1372delAAAC            | p.K457Rfs*16      |
| 21      | Exon10            | Deletion          | c.1305_1307delTTTinsG         | p.F436Sfs*11      |
| 22      | Exon10            | Frameshift        | c.1367dupA                    | p.Q458Tfs13       |
| 23      | Exon11            | Nonsense          | c.1429A>T                     | p.K477X           |
| 24      | Exon11            | Missense          | c.1460A>G                     | p.D487G           |
| 25      | Exon11            | Missense          | c.1472G>A                     | p.Arg491Gln       |
| 26      | Exon12            | Nonsense          | c.2617C>T                     | p.Arg873Ter       |
| 27      | Exon12            | Frameshift        | c.2619delA                    | p.E874Sfs22       |
